# Supplementary material for: Controllable synthesis of elliptical Fe3O4@C and Fe3O4/Fe@C nanorings for plasmon resonance-enhanced microwave absorption
Source: Royal Society of Chemistry journal article supplement (doi:10.1039/c6tc01737a), 2016-01-01
Supplement: c6tc01737a1.pdf [file c6tc01737a1.pdf]

## Electronic Supplementary Information (ESI)

### Controllable synthesis of elliptical Fe<sub>3</sub>O<sub>4</sub>@C and Fe<sub>3</sub>O<sub>4</sub>/Fe@C nanorings for plasmon resonance-enhanced microwave absorption

Yun Liu,<sup>ab</sup> Yana Li,<sup>a</sup> Kedan Jiang,<sup>a</sup> Guoxiu Tong,<sup>\*a</sup> Tianxi Lv,<sup>a</sup> Wenhua Wu<sup>a</sup>

<sup>a</sup> College of Chemistry and Life Sciences, Zhejiang Normal University, Jinhua 321004, People's Republic of China

<sup>b</sup> State Key Laboratory of Advanced Technology for Materials Synthesis and Processing, Wuhan University of Technology, Wuhan 430070, People's Republic of China

\*Corresponding author. E-mail address: tonggx@zjnu.cn (G.X. Tong).

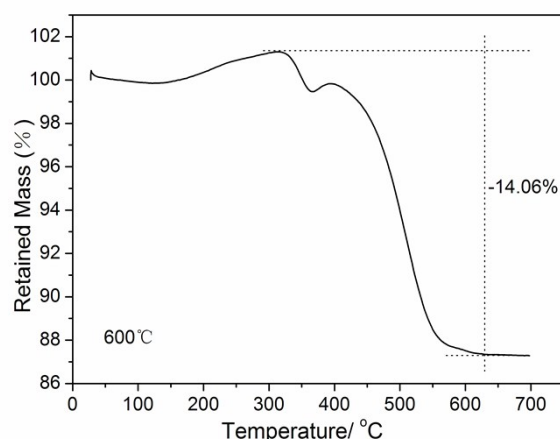

**Fig. S1** Thermogravimetric (TG) curves of the sample obtained at 600 °C.

The carbon content of the sample obtained at 600 °C was quantitatively determined by thermogravimetric (TG) analysis (Fig. S1). Heating the materials from room temperature to 700 °C in air produces only Fe<sub>2</sub>O<sub>3</sub>. From the TG curve, it can be observed that there is a small weight loss below 150 °C due to the remove of adsorbed water and gaseous contents.<sup>1</sup> And two weight increase regions from 150 °C to 300 °C and 350 °C to 400 °C are caused by the oxidation of Fe<sub>3</sub>O<sub>4</sub> and Fe to Fe<sub>2</sub>O<sub>3</sub> when heated in air.<sup>2</sup> The combustion of carbon causes the main weight loss, which begins around 300 °C and completes at about 650 °C.<sup>3,4</sup> Based on the analysis above and Fig. S1, the

carbon content of the core-shell sample can be estimated as  $\sim 14.06\%$ .

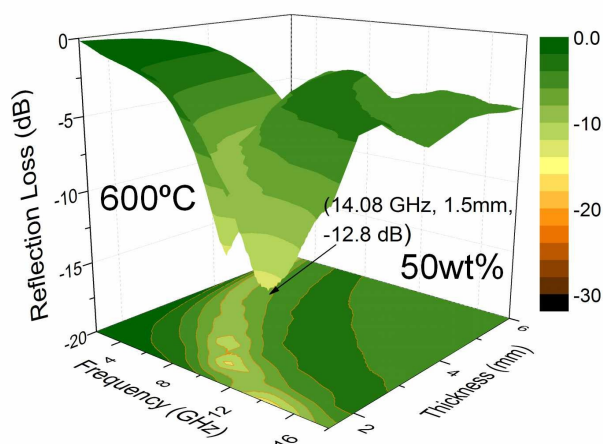

**Fig. S2** 3D plots of reflection loss for wax composites containing 50 w% NRs formed at 600 °C.

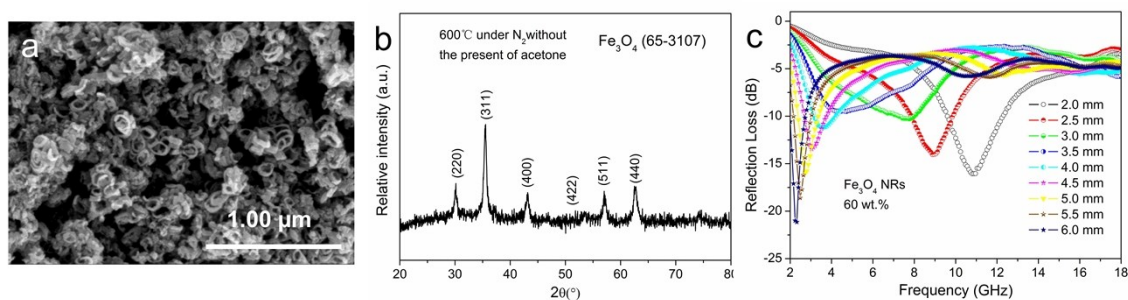

**Fig. S3** (a) SEM image and (b) XRD pattern of the sample obtained by sintering the nanosheet precursors at 600 °C for 2 h under  $N_2$  without the present of acetone. (c) Reflection loss curves for wax composites containing 60 wt.%  $Fe_3O_4$  NRs formed at 600 °C.

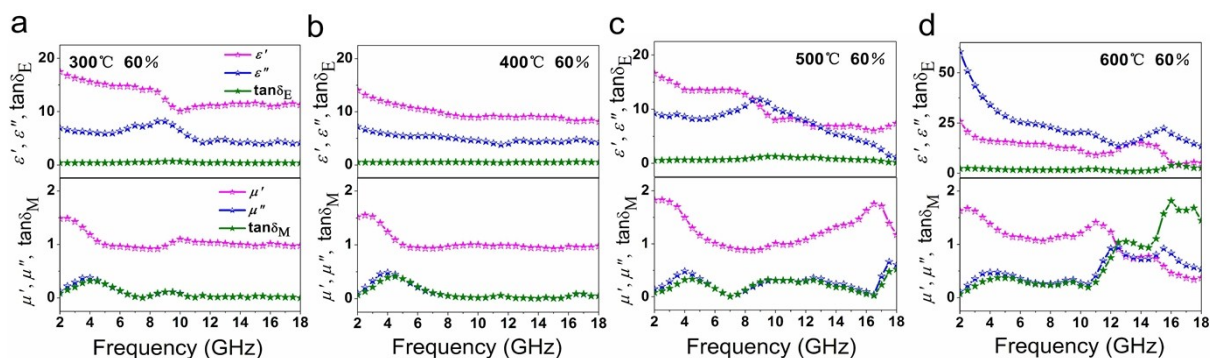

**Fig. S4** Frequency dependence of the real ( $\epsilon'$ ) and imaginary ( $\epsilon''$ ) parts of the relative complex permittivity, the dielectric loss ( $\tan\delta_E$ ), the real ( $\mu'$ ) and imaginary ( $\mu''$ ) parts of the relative complex permeability, and the magnetic loss ( $\tan\delta_M$ ) of NRs formed at various  $t_s$ . (a) 300 °C, (b) 400 °C, (c) 500 °C, and (d) 600 °C.

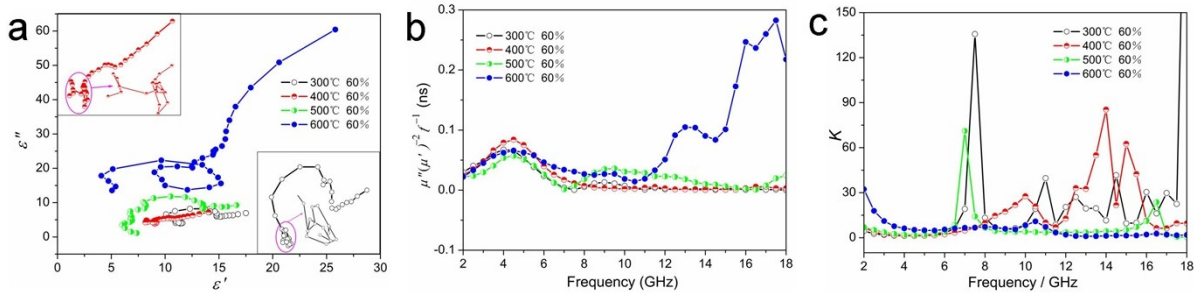

**Fig. S5** (a) Cole-Cole semicircles ( $\epsilon'$  versus  $\epsilon''$ ), (b)  $\mu''(\mu')^{-2} f^{-1}$  (representing eddy current loss) versus frequency and (c) Matching constant ( $K = |\tan \delta_E / \tan \delta_M|$ ) versus frequency of NRs formed at various  $t$ .

## Reference

- 1 T. Zhu, J. S. Chen, X. W. Lou, *J. Phys. Chem. C*, 2011, **115**, 9814.
- 2 B. Zhang, Y. C. Du, P. Zhang, H. T. Zhao, L. L. Kang, X. J. Han, P. Xu, *J. Appl. Polym. Sci.*, 2013, **130**, 1909.
- 3 F. Wu, R. Huang, D. B. Mu, B. R. Wu, S. Chen, *ACS Appl. Mater. Interfaces*, 2014, **6**, 19254.
- 4 Y.R. Wang, L. Zhang, X.H. Gao, L.Y. Mao, Y. Hu, X. W. Lou, *Small*, 2014, **10**, 2815.
